# Supplementary material
Source: PubMed Central journal article supplement (PMC2723158)
Supplement: supp_122_12_2064__1.pdf [file supp_122_12_2064__1.pdf]

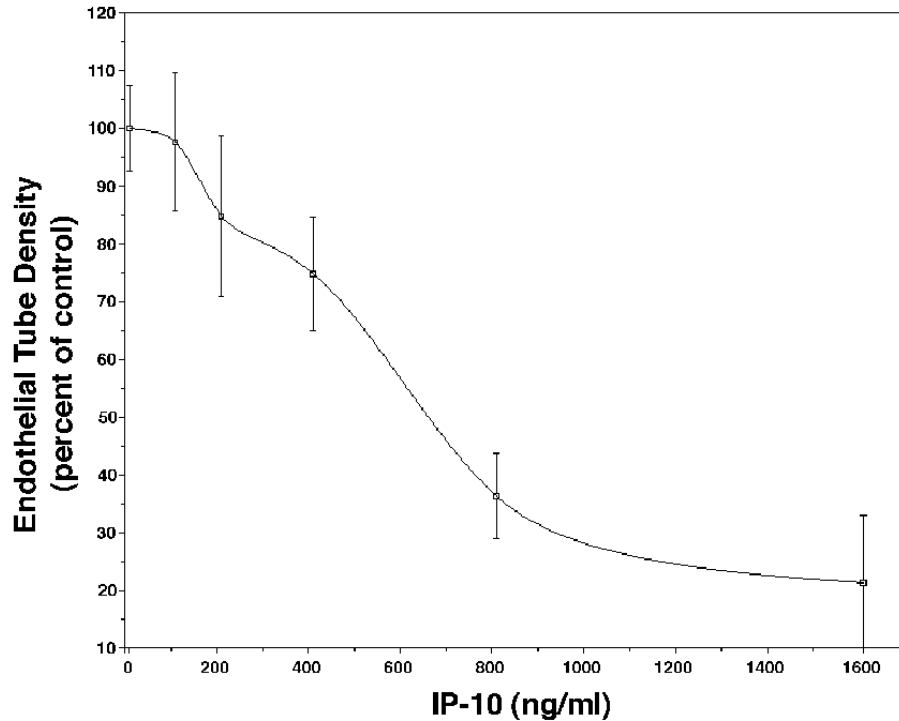

### Supplemental Fig. 1. IP-10 dose response curve

To determine the concentration of IP-10 that produced maximal dissociation of the formed cords on Matrigel, HMEC-1 cells were incubated for 24 hrs on Matrigel to allow cord formation. The media was replaced with 0.5% dFBS-MCDB131 media containing increasing concentrations of IP-10 from 0-1600 ng/ml. Cords were analyzed using MetaMorph and quantified as area occupied by the cells. The IC50 was determined to be 500 ng/mL. The results are of 4 individual experiments (average  $\pm$  s.e.m.).
