# Supplementary material
Source: PubMed Central journal article supplement (PMC2723158)
Supplement: supp_122_12_2064__2.pdf [file supp_122_12_2064__2.pdf]

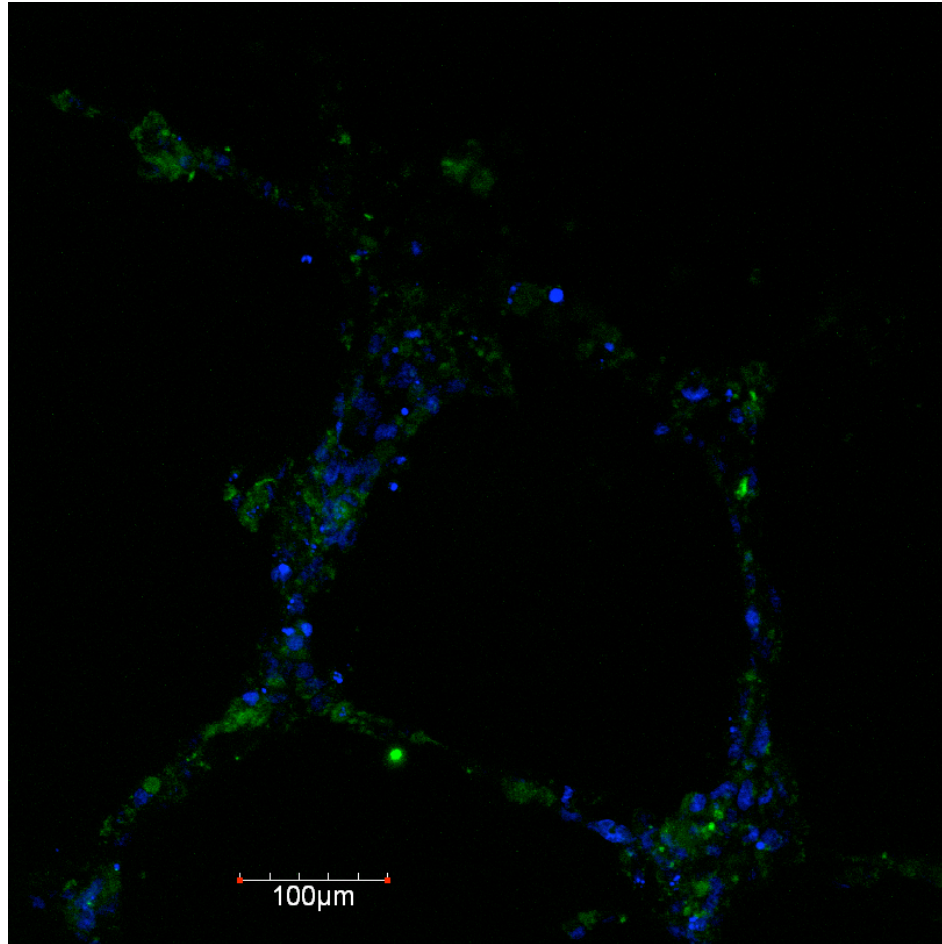

### **Supplemental Fig. 2. CXCR3 expression on endothelial tubes**

To verify that CXCR3 is expressed on newly formed tubes, HMEC-1 cells were plated on 8 well chamber cover slips (Nalgene) coated with growth factor reduced Matrigel (35,000 cells/well). Cells were incubated for 48 hrs in 2.0% dialyzed FBS-MCDB131 media. The cells were fixed with 2% paraformaldehyde-PBS then immuno stained with mouse anti-CXCR3<sup>FITC</sup> (Green) antibody (R&D Systems, 1:300 dilution). Cells were also incubated with Draq5 (nuclei, Blue). The tubes were imaged on an Olympus Fluoview confocal microscope using a LucPlanFLN 20x/0.45 objective.
