# Supplementary material
Source: PubMed Central journal article supplement (PMC2723158)
Supplement: supp_122_12_2064__3.pdf [file supp_122_12_2064__3.pdf]

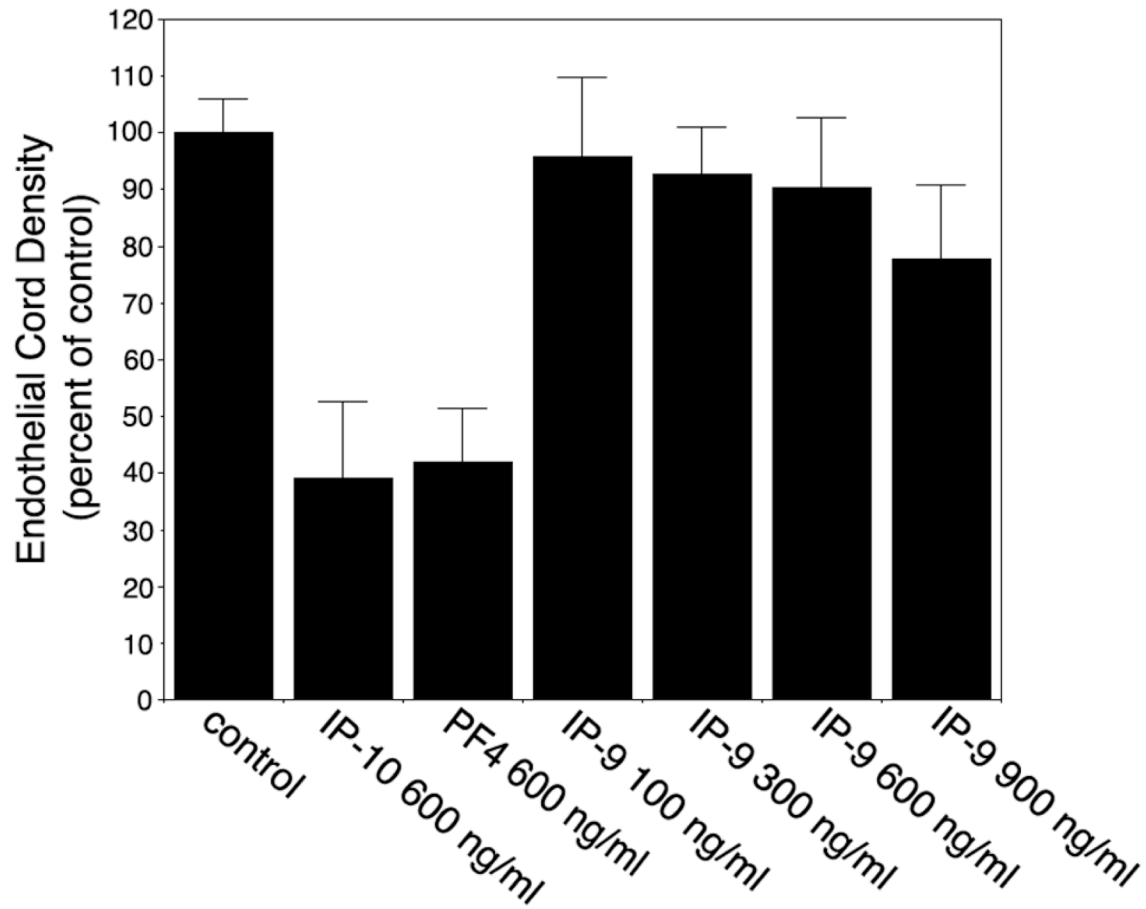

**Fig. S3. IP-9 has a limited effect on endothelial tubes**

HMEC-1 were incubated on growth factor reduced Matrigel in media containing 75 ng/ml VEGF for 24 hrs to induce cord formation. The media was removed and the cells were then incubated in 0.5% dialyzed FBS-MCDB 131 only (control) or containing varying concentrations of IP-9/ITAC (CXCL11) from 100-900 ng/ml for 24 hrs. These data indicate that IP-9/ITAC alone is not sufficient to induce significant tube dissociation compared to IP-10 or PF4. These results were not unexpected, as IP-9/ITAC has been shown to have a low affinity for CXCR3B the isoform expressed on endothelial cells (Lasagni et al., 2003). IP-9/ITAC has a high affinity for CXCR3A (expressed on lymphocytes and monocytes) and plays a significant role in the activation of T-cells, NK cells and monocytes. Quantification of the endothelial cord area was determined, using MetaMorph. (mean  $\pm$  s.e.m., n = 4).
