# Supplementary material
Source: PubMed Central journal article supplement (PMC2723158)
Supplement: supp_122_12_2064__4.pdf [file supp_122_12_2064__4.pdf]

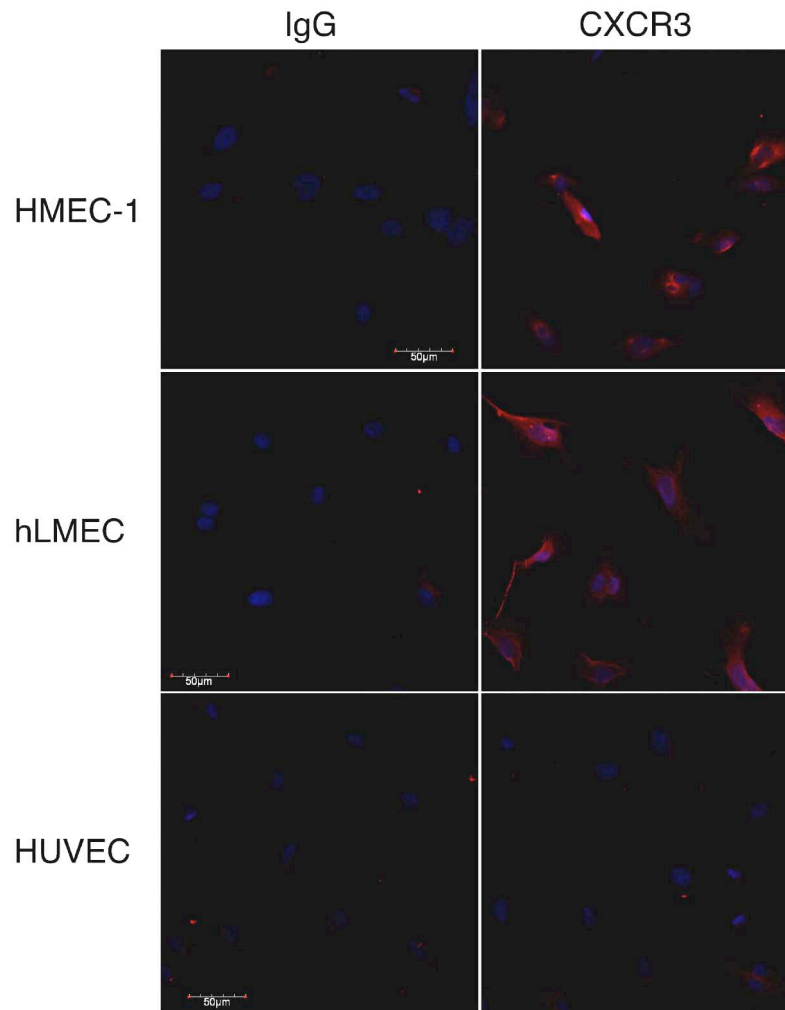

**Fig. S4. CXCR3 expression on endothelial cells.**

Immortalized human dermal endothelial cells (HMEC-1)(Ades et al., 1992), human lung microvascular endothelial cells (hLMEC) and human umbilical vein endothelial cells were plated on 8 well chamber cover slides that were coated with 0.1% gelatin. Cells were plated (10,000 cells/well) in complete media and incubated for 48 hrs. The cells were fixed then stained for CXCR3 (R&D, 1:600) overnight at 4°C. The cell were then incubated with a Goat anti-mouse<sup>Texas Red</sup> (1:500, Jacksons Immuno-Research) and Draq5 (1:3000, Axxora) for 30 min at room temperature. The cells were imaged with an Olympus Fluoview 1000 confocal microscope using an UPlanFLN 40x/1.30 oil objective. The data shows that both the HMEC-1 and hLMEC cells express CXCR3 under mitotic conditions whereas, HUVEC show very low to no expression of CXCR3 under the same conditions.
