# Supplementary material
Source: PubMed Central journal article supplement (PMC2723158)
Supplement: supp_122_12_2064__5.pdf [file supp_122_12_2064__5.pdf]

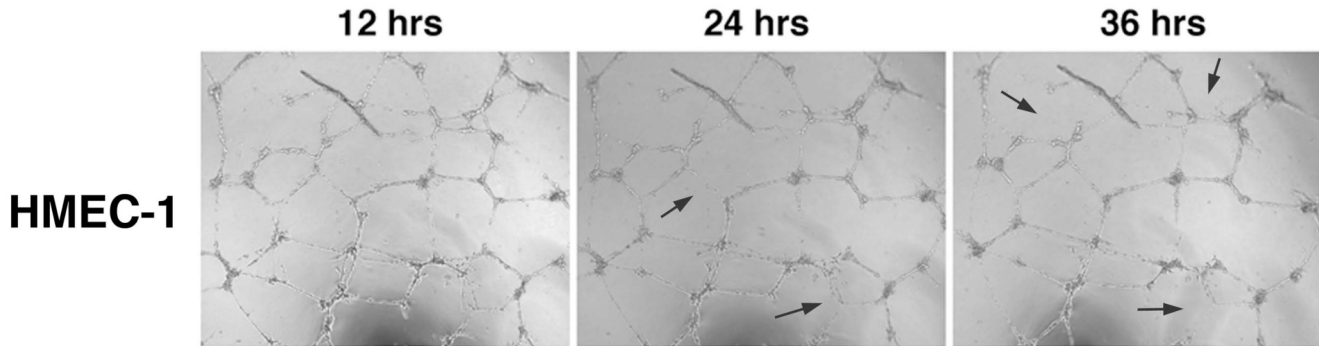

**Fig. S5. HMEC-1 cords are stable for 36 hrs on Matrigel.**

To demonstrate that withdrawal of growth factors does not induce significant cord dissociation, HMEC-1 were incubated in media containing 75 ng/ml VEGF for 24 hrs to induce cord formation. The media was removed and the cells were then serum starved (0.5% dialyzed FBS-MCDB 131) in the absence of exogenous VEGF in the media for 36 hrs. Shown are identical locations of cords at 12-36 hrs post serum starvation. Some dissociation of the formed cords (arrows) is observed with the cells but the overall stability of the cord structures is maintained over a 36 hr period. These data indicate that withdraw of exogenous growth factor alone does not cause dissociation of cords in this system using HMEC-1 cells, but the primary dermal endothelial cells may require additional tropic factors to enhance cord stability. Pictures shown are from one of three repeated experiments. The cords were imaged with a Spot RT<sub>KE</sub> camera on an Olympus IX 70 microscope (UPlanFl 4x/0.13).
