# Supplementary material
Source: PubMed Central journal article supplement (PMC2723158)
Supplement: supp_122_12_2064__6.pdf [file supp_122_12_2064__6.pdf]

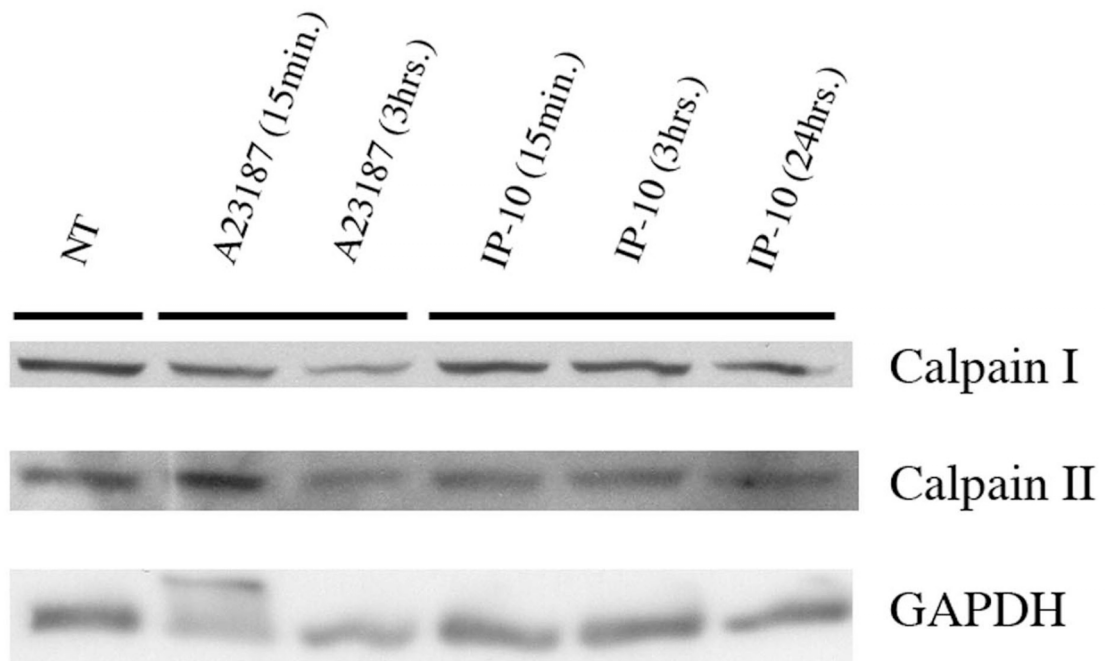

**Fig. S6. IP-10 does not affect calpain expression.**

To determine whether IP-10 influenced calpain protein levels we treated cell with IP-10 (600 ng/ml) or the calcium ionophore A23187 (2  $\mu$ M) for 15 min, 3 hrs or 24 hrs. The cells were lysed and the lysate was immunoblotted for calpain I ( $\mu$ -calpain) or calpain II (m-calpain). The rabbit anti-calpain I antibody (1:1200 dilution, Santa Cruz) and rabbit anti-calpain II antibody (1:1000, Chemicon) were diluted in 5% NFM-TBS and incubated at 4°C overnight. The proteins were visualized with a goat anti-rabbit<sup>HRP</sup> antibody (1:5000 dilution, Biosource) and ECL (GE Healthcare). IP-10 treatment did not cause a change in the protein expression of calpain I or II. As a positive control, treatment of the cell with A23187 decreased both calpain I and II protein levels as expected secondary to activation-associated degradation due to the flood of calcium into the cell from the ionophore.
